# Supplementary material
Source: publisher figshare collection journal article supplement (https://gsajournals.figshare.com/ndownloader/files/15456023)
Supplement: Supplementary file 1 [file 15456023]

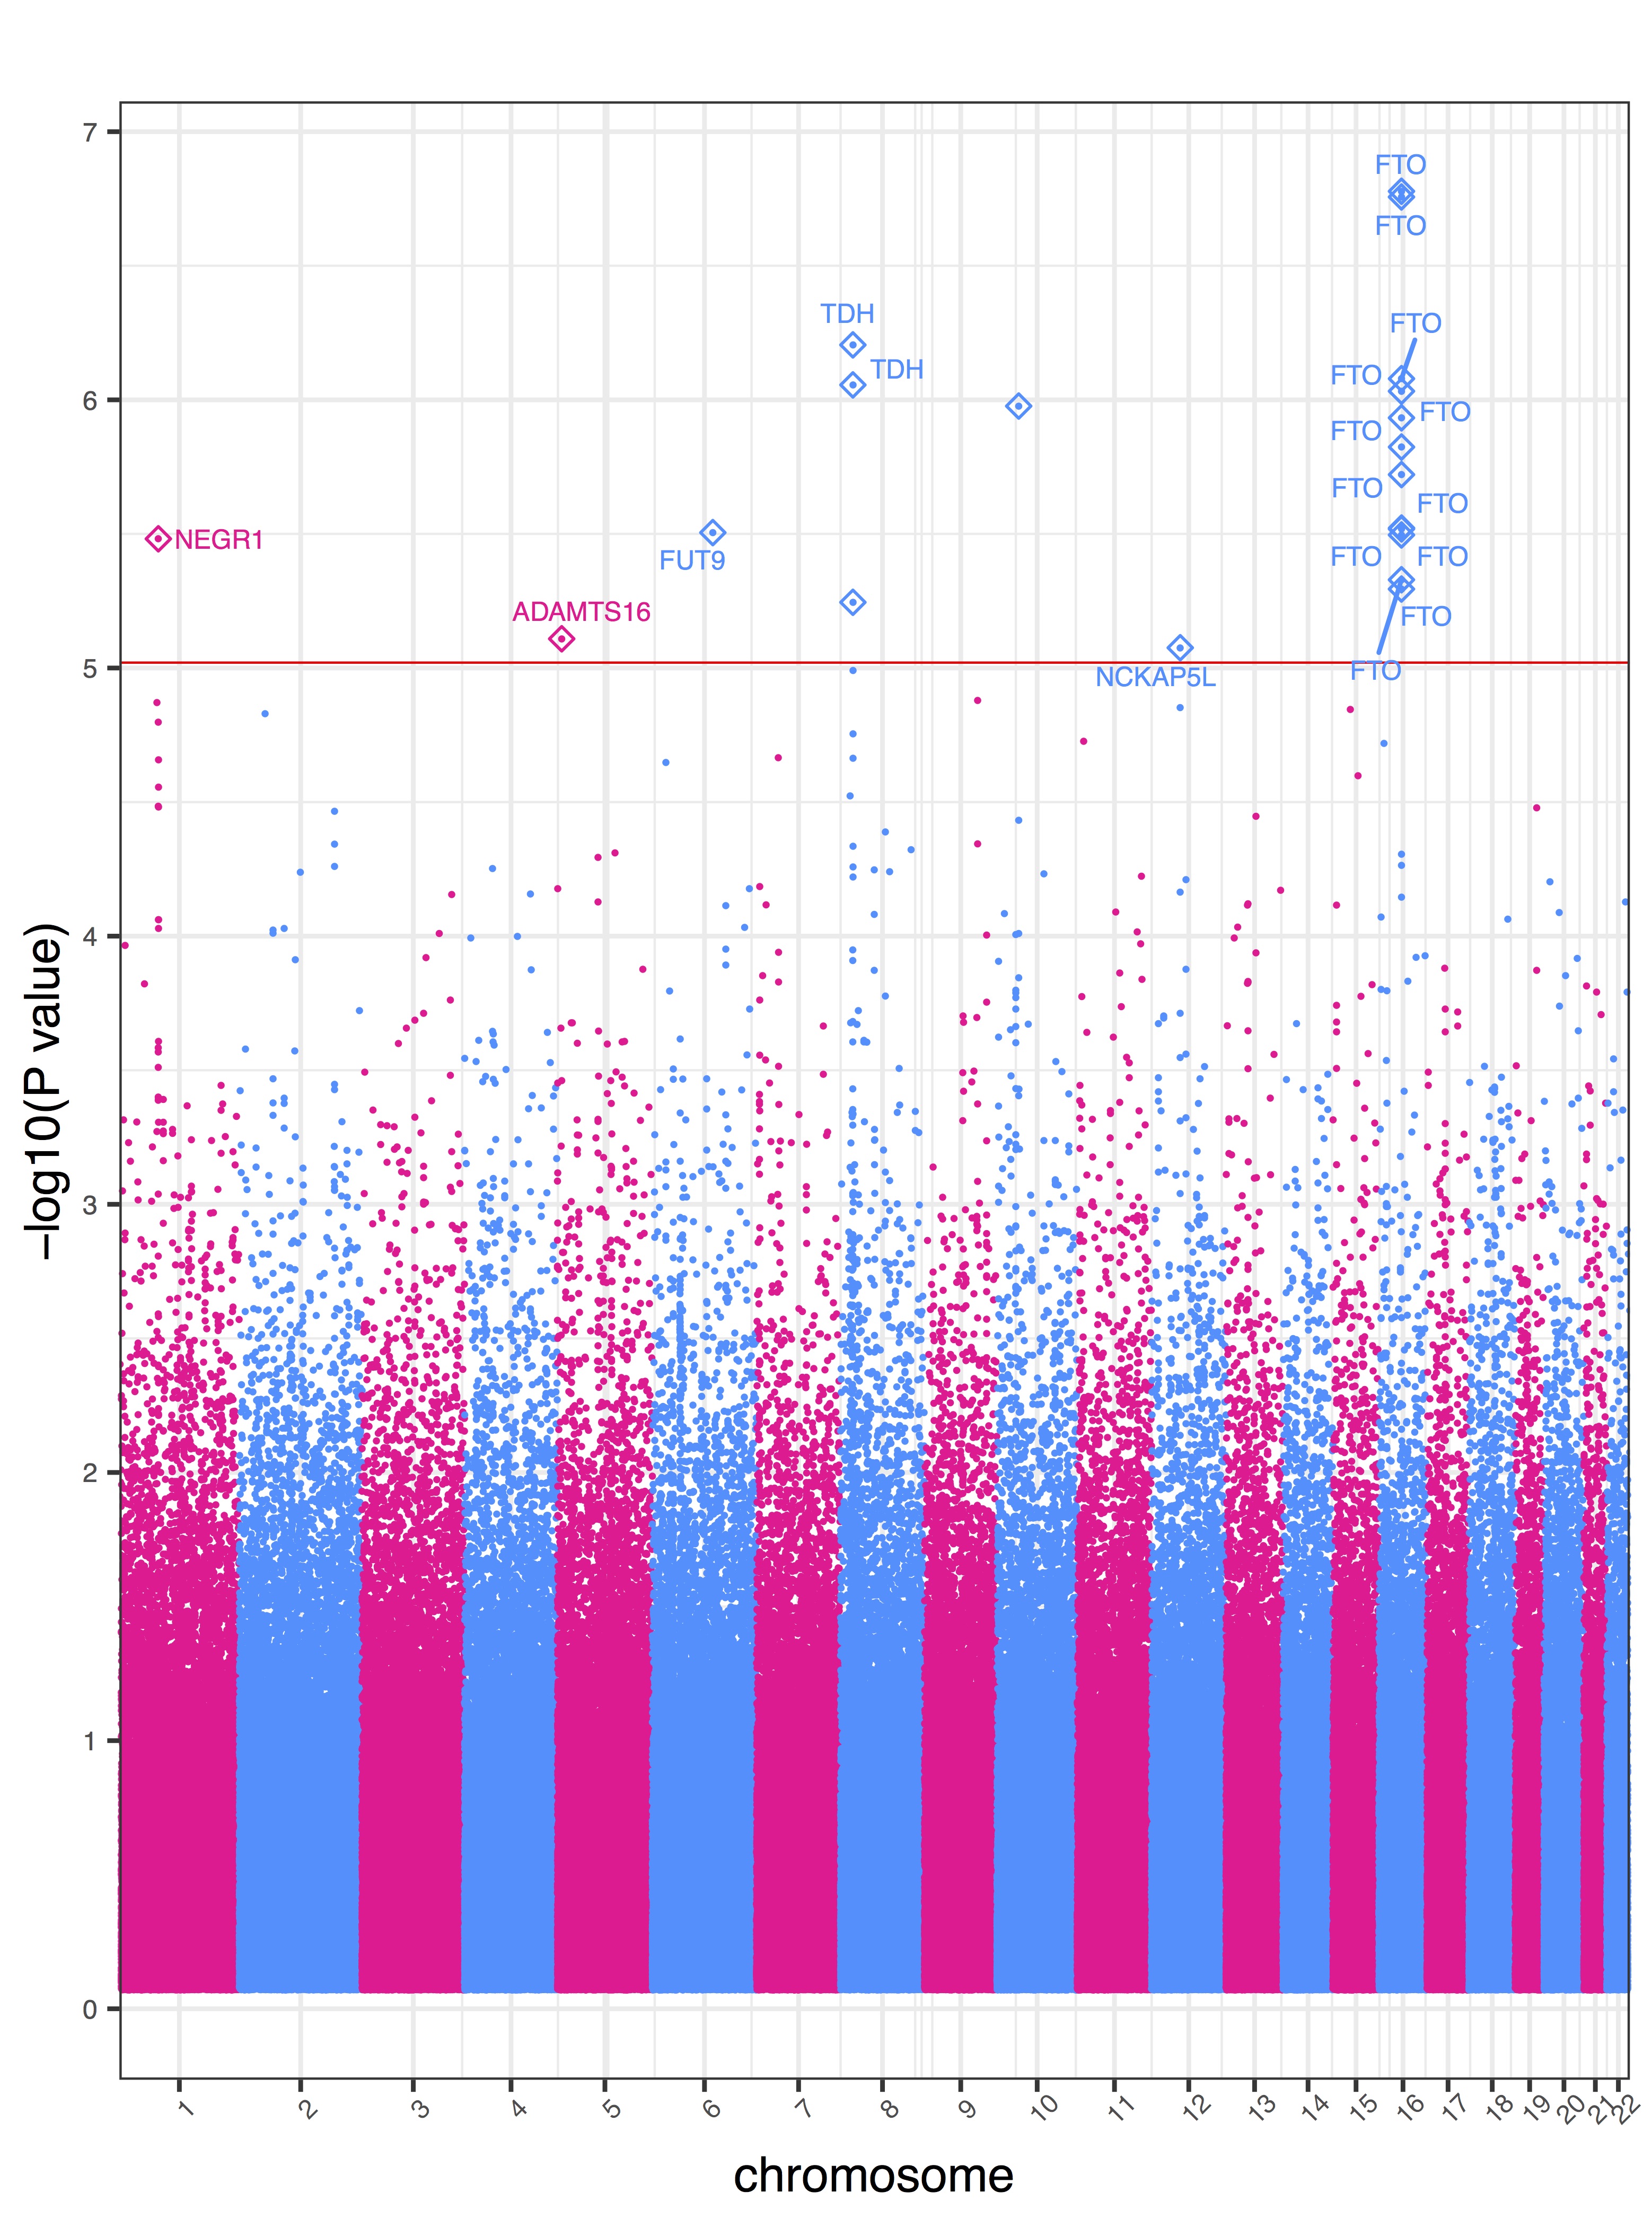


**Supplementary Figure S2:** **Manhattan plot of GWAS results of BMI with DM2-diagnosed individuals removed**

Genome-wide association study results for BMI. This study excludes DM2-diagnosed individuals. The *x*-axis represents the genomic position of 500,508 SNPs. The *y*-axis represents -log10-transformed raw *p*-values of each genotypic association. The red horizontal line indicates the significance level 1x10-5.
